# Supplementary material
Source: PubMed Central journal article supplement (PMC6475433)
Supplement: pnas.1821844116.sapp.pdf [file pnas.1821844116.sapp.pdf]

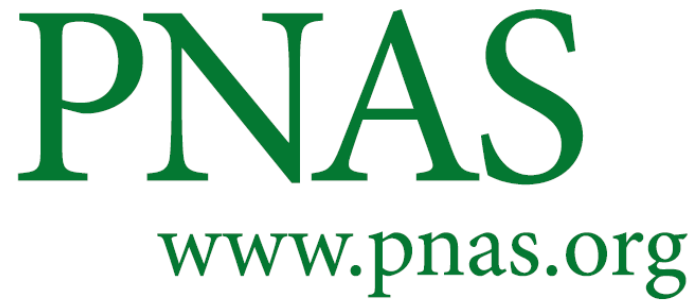

## Supplementary Information for

Pejvakin-mediated pexophagy protects auditory hair cells against noise-induced damage

Jean Defourny, Alain Aghaie, Isabelle Perfettini, Paul Avan, Sedigheh Delmaghani<sup>1</sup>,  
Christine Petit<sup>1</sup>

<sup>1</sup>S.D. and C.P. contributed equally to this work

Correspondence: Sedigheh Delmaghani or Christine Petit

Email: [sedigheh.delmaghani@pasteur.fr](mailto:sedigheh.delmaghani@pasteur.fr) or [christine.petit@pasteur.fr](mailto:christine.petit@pasteur.fr)

### **This PDF file includes:**

Figs. S1 to S5

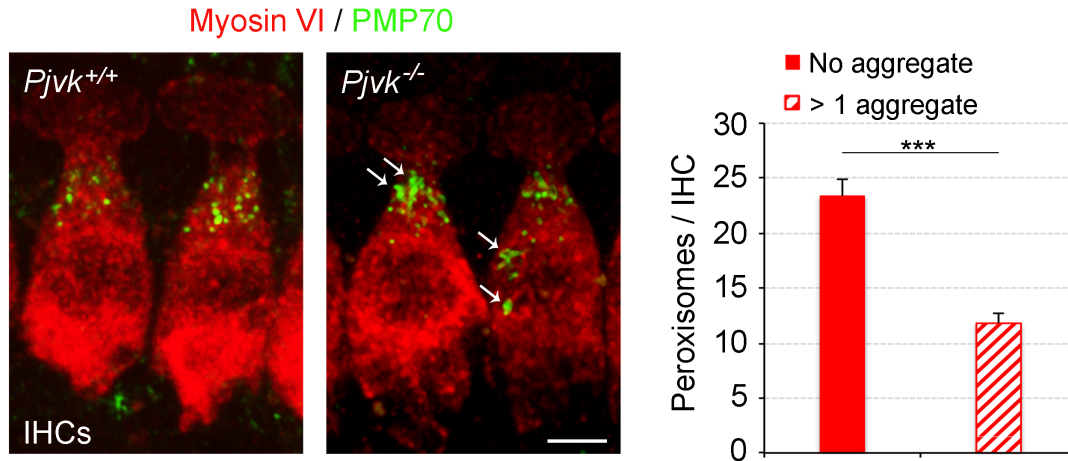

**Fig. S1. Peroxisomes cluster together after sound exposure in *Pjvk*<sup>-/-</sup> IHCs.** Peroxisomes were counted 24 hours after sound exposure (5-40 kHz, 105 dB SPL, for 1 hour). IHCs and peroxisomes were immunostained with anti-myosin VI, and anti-PMP70 antibodies, respectively. The decrease in peroxisome number was correlated with the formation of aggregates (indicated by arrows) in *Pjvk*<sup>-/-</sup> IHCs. The bar charts compare the numbers of peroxisomes in IHCs containing at least one aggregate with the number of those containing no aggregates ( $n = 40$  IHCs from 4 mice). The number of peroxisomes is significantly lower in *Pjvk*<sup>-/-</sup> IHCs containing aggregates. Scale bar, 5  $\mu$ m. Mean  $\pm$  SEM; \*\*\* $P < 0.001$  (unpaired Student's  $t$ -test).

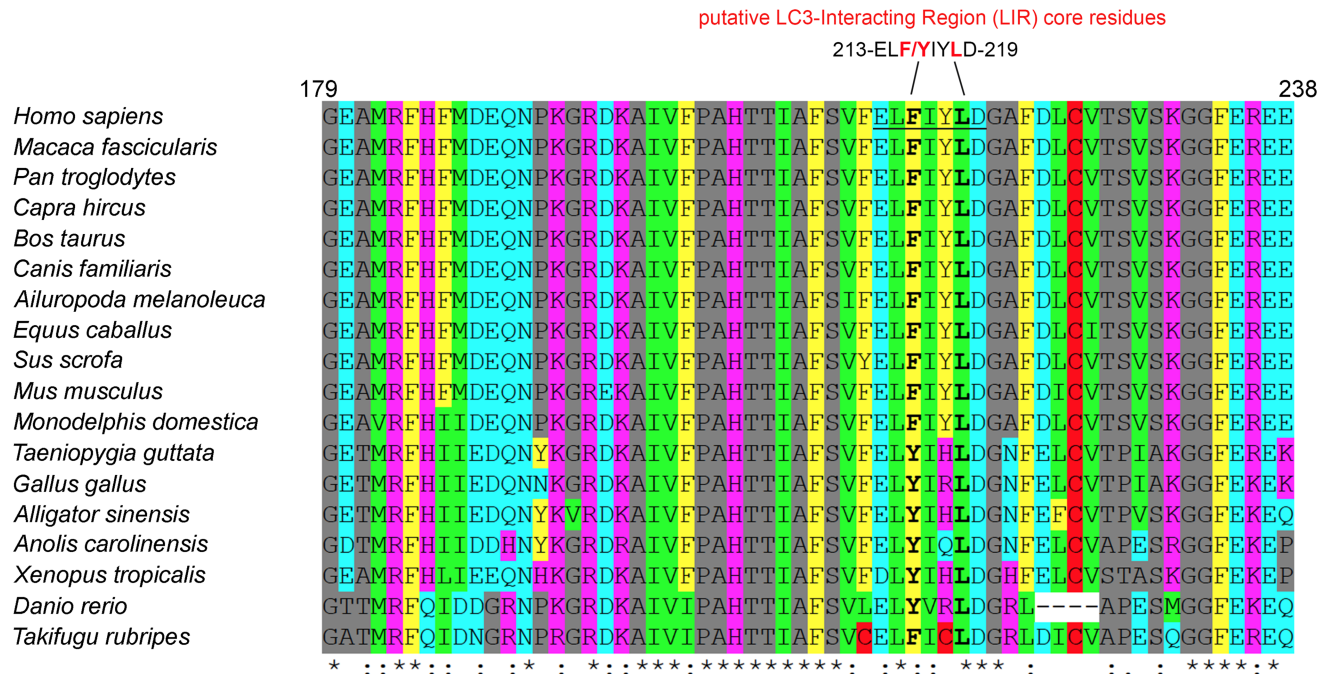

**Fig. S2. Comparison of the putative LIR sequence within the chaperone domain of pejkakin between vertebrates.** The amino-acid residues of the LIR motif of pejkakin are underlined in black. The core residues of LIR, F/Y215 and L218, are highly conserved throughout evolution.

A

Pejvakin sequence (*Mus musculus*)

```

1  MFAAATKSFVKQVGDGGRLVPVPSLSEADKYQPLSLVVKKKRCFLFPRCKFTSTPFTLKD  60
61  ILLGDREISAGISSYQLLNYEDESVDVSLYGRRSNHIVNDVGINVTGSDSIAVKASFGVVT  120
                                     predicted chaperone domain (aa 154 - 227)
121 KHEVEVSTLLKEITARKINFDHSLIRQSRSSRKAVLCVVMESIRTRQCSLSVHAGIRGE  180
181 AMRFHFMDEQNPKGREKAIVFPAHTTIAFSVFELFIYLDGAFDICVTSVSKGGFEREETT  240
241 TFAMFYRLRNILFERNRRVMDAISRSQLYLDDLFSDFYDKPLSMTDISLKEGTHIRVNLL  300
301 NHNIPKGPCILCGMGNLKRETVYGCFQCSVDGVKYVRLHAVPCFDIWHKRMK  352

```

putative LC3-Interacting Region (LIR) motif

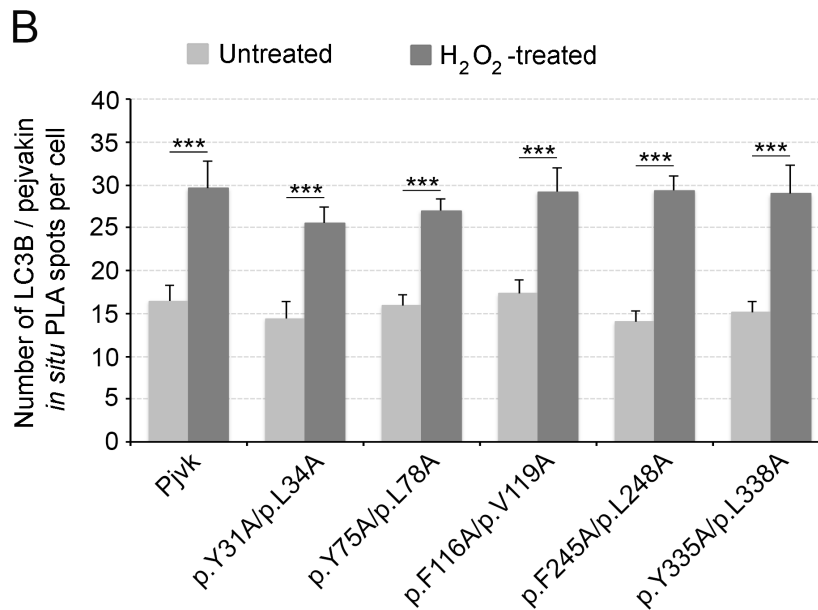

**Fig. S3. Mutations in putative LIR motifs outside the chaperone domain of pejvakin do not impair the recruitment of LC3B by pejvakin in response to oxidative stress.** (A) Schematic localization of putative LIR motifs in the pejvakin sequence (in red, with a core consensus sequence [W/F/Y]X<sub>1</sub>X<sub>2</sub>[L/I/V]) outside the chaperone domain (highlighted in blue). (B) The number of LC3B/pejvakin *in situ* PLA spots is significantly increased by H<sub>2</sub>O<sub>2</sub> treatment in transfected HeLa cells producing EGFP and wild-type pejvakin (Pjvk) or EGFP and the p.Y31A/p.L34A, p.Y75A/p.L78A, p.F116A/p.V119A, p.F245A/p.L248A or p.Y335A/p.L338A mutated forms of pejvakin ( $n = 20$  cells per condition). Mean  $\pm$  SEM; \*\*\* $P < 0.001$  (unpaired Student's  $t$ -test).

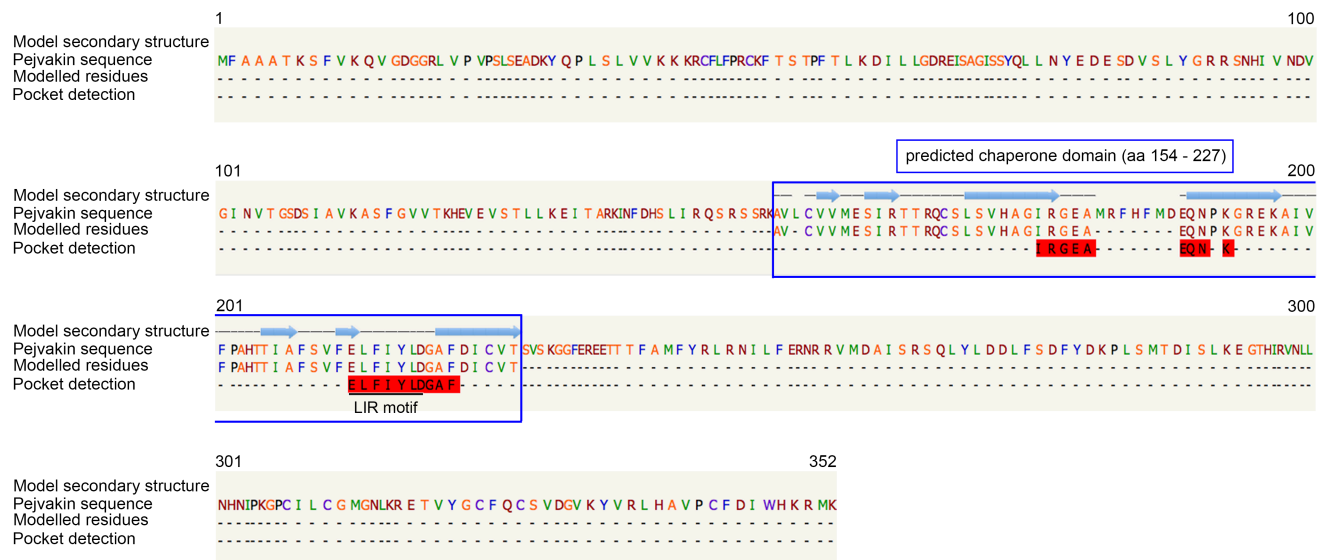

**Fig. S4. Pejvakin contains a predicted protein-binding pocket including functional LIR residues.** Pocket detection in the pejvakin sequence, with the Fpocket tool. The predicted chaperone domain is boxed in blue and the predicted pocket amino-acid residues are highlighted in red. The amino-acid residues of the functional LIR motif are underlined in black within the predicted pocket.

**A**

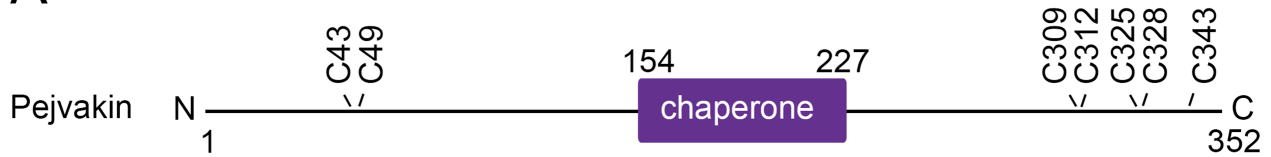

**B**

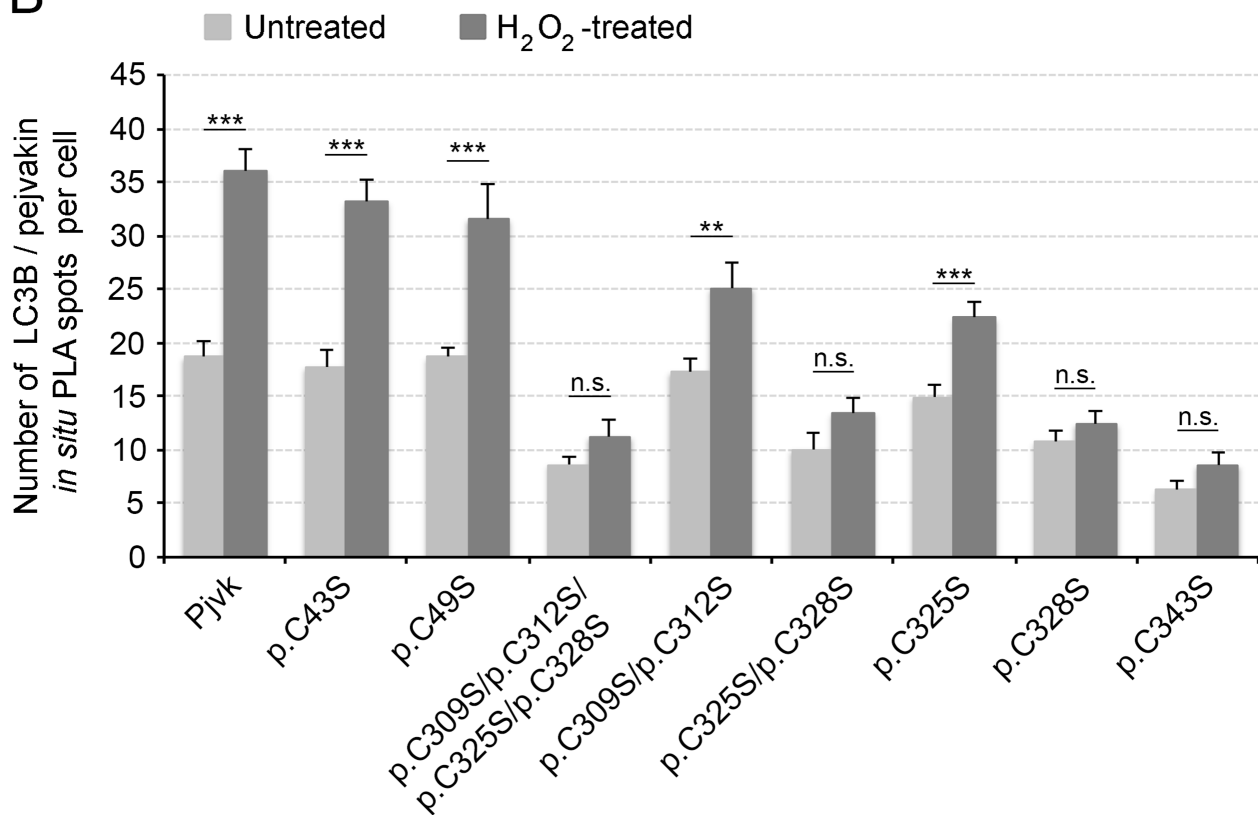

**Fig. S5. C-terminal cysteines are required for the oxidative stress-induced binding of pejvakin to LC3B whereas N-terminal cysteines are not.** (A) Schematic representation of cysteines N- or C-terminal to the predicted chaperone domain of pejvakin. (B) The number of LC3B/pejvakin *in situ* PLA spots was significantly increased by H<sub>2</sub>O<sub>2</sub> treatment in transfected HeLa cells producing EGFP and wild-type pejvakin (Pjvk) or EGFP and the p.C43S, p.C49S, p.C309S/p.C312S or p.C325S mutated forms of pejvakin, but not in transfected HeLa cells producing EGFP and the p.C325S/p.C328S, p.C309S/p.C312S/p.C325S/p.C328S, p.C328S or p.C343S mutated forms of pejvakin ( $n = 20$  cells per condition). Mean  $\pm$  SEM; \*\* $P < 0.01$ , \*\*\* $P < 0.001$ , n.s., not significant (unpaired Student's  $t$ -test).
